# Supplementary material for: Association between Exposure to Volatile Organic Compounds and the Prevalence of Sleep Problems in US Adults
Source: MDPI journal article supplement (doi:10.3390/toxics12030222), 2024-03-18
Supplement: s1 [file s1]

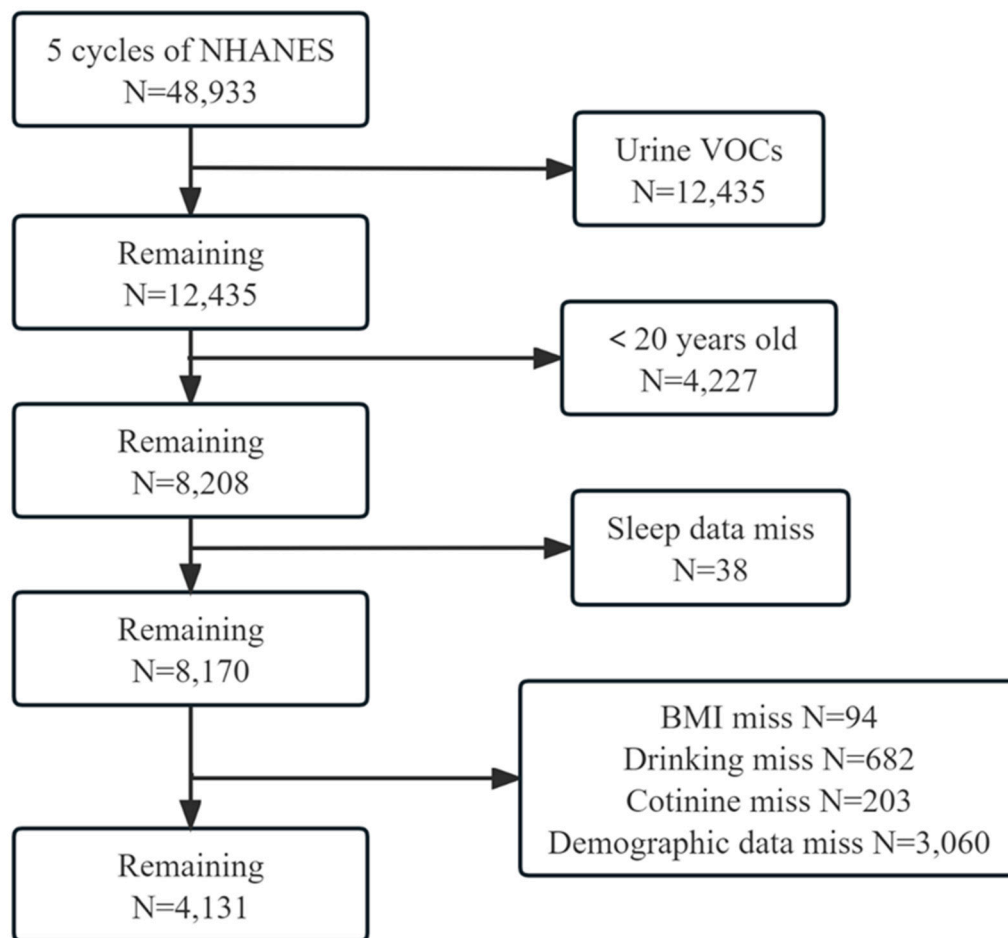

**Figure. S1** The flow gram of screening out eligible participants from 6 survey cycles (2005–2006, 2011–2012, 2013–2014, 2015–2016, 2017–2018) of the National Health and Nutrition Examination Survey (NHANES) program.
